# Supplementary material
Source: Royal Society of Chemistry journal article supplement (doi:10.1039/d6ta02478e)
Supplement: d6ta02478e7.pdf [file d6ta02478e7.pdf]

1

## Supplementary Materials

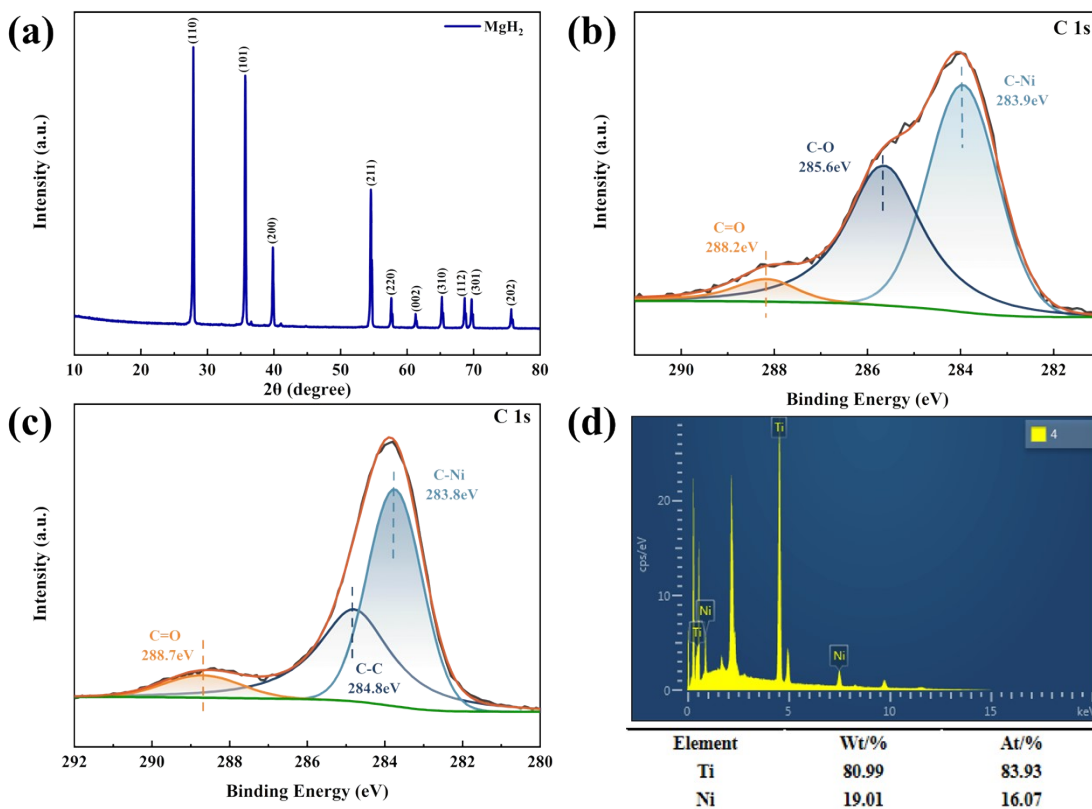

2

3

4

5

Fig. S1. (a) XRD pattern of the original  $\text{MgH}_2$ ; XPS spectra of C in (b)  $\text{Ti}_4\text{Ni}$  and (c)  $\text{MgH}_2\text{-Ti}_4\text{Ni@CNT}_1$ ; (d) EDS of  $\text{Ti}_4\text{Ni}$

6

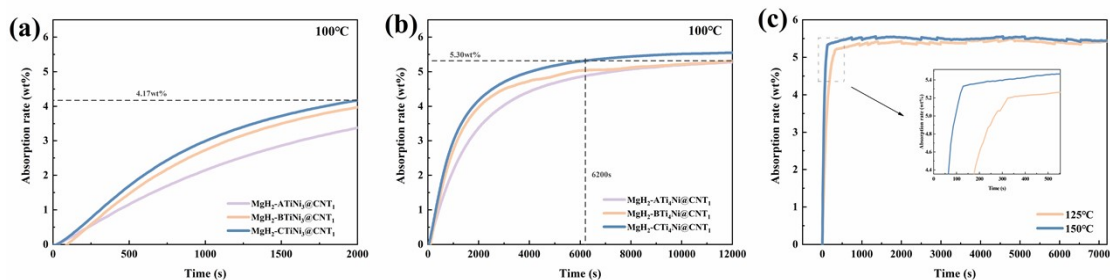

7

8

9

Fig. S2. Isothermal hydrogen absorption curves of  $\text{MgH}_2\text{-Ti}_4\text{Ni@CNT}_1$  at 100 °C for part (a) and whole (b); (c) isothermal hydrogen absorption curves of  $\text{MgH}_2\text{-Ti}_4\text{Ni@CNT}_1$  at 100 and 150 °C.

10

It should be noted that in Fig. S2c, the curve of hydrogen absorption in the later stage is a normal fluctuation phenomenon, which does not affect the  $\text{MgH}_2\text{-Ti}_4\text{Ni@CNT}_1$ . The judgment of hydrogen storage performance and the subsequent dynamic fitting calculation process.

11

12

13

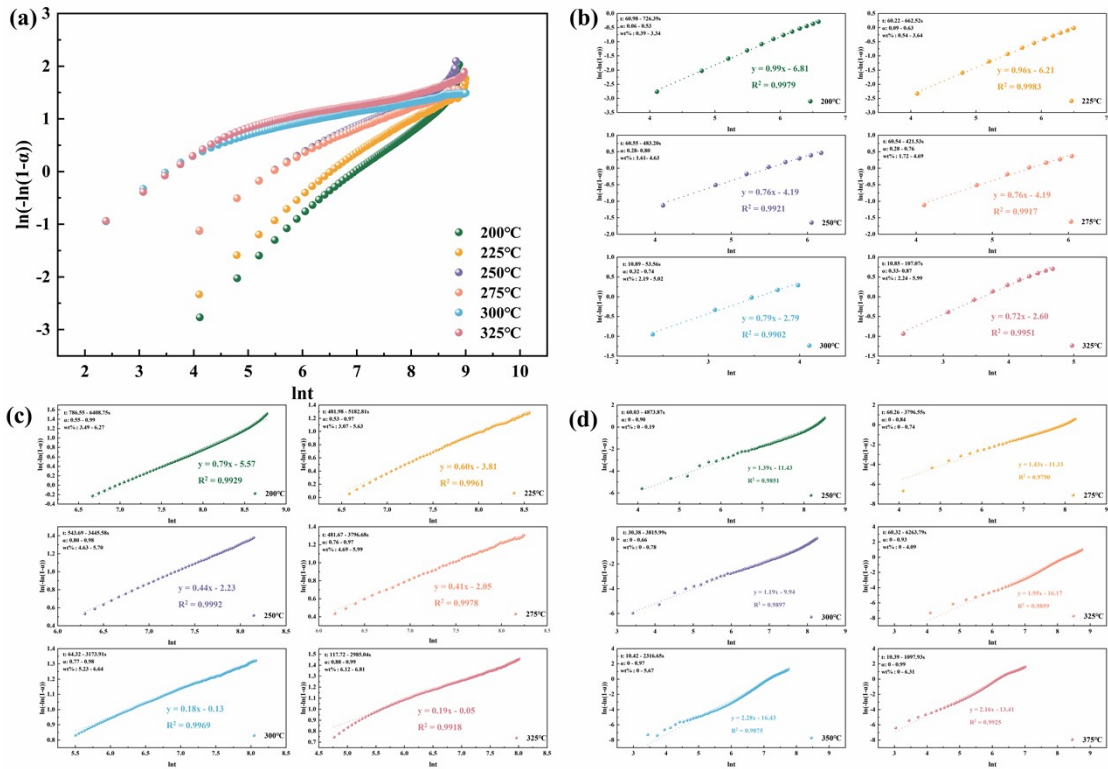

14

15 Fig. S3. The JMAK fitting plots of BM-MgH<sub>2</sub>: (a) overall hydrogenation, (b) early hydrogenation,  
 16 (c) late hydrogenation, and (d) dehydrogenation.

17

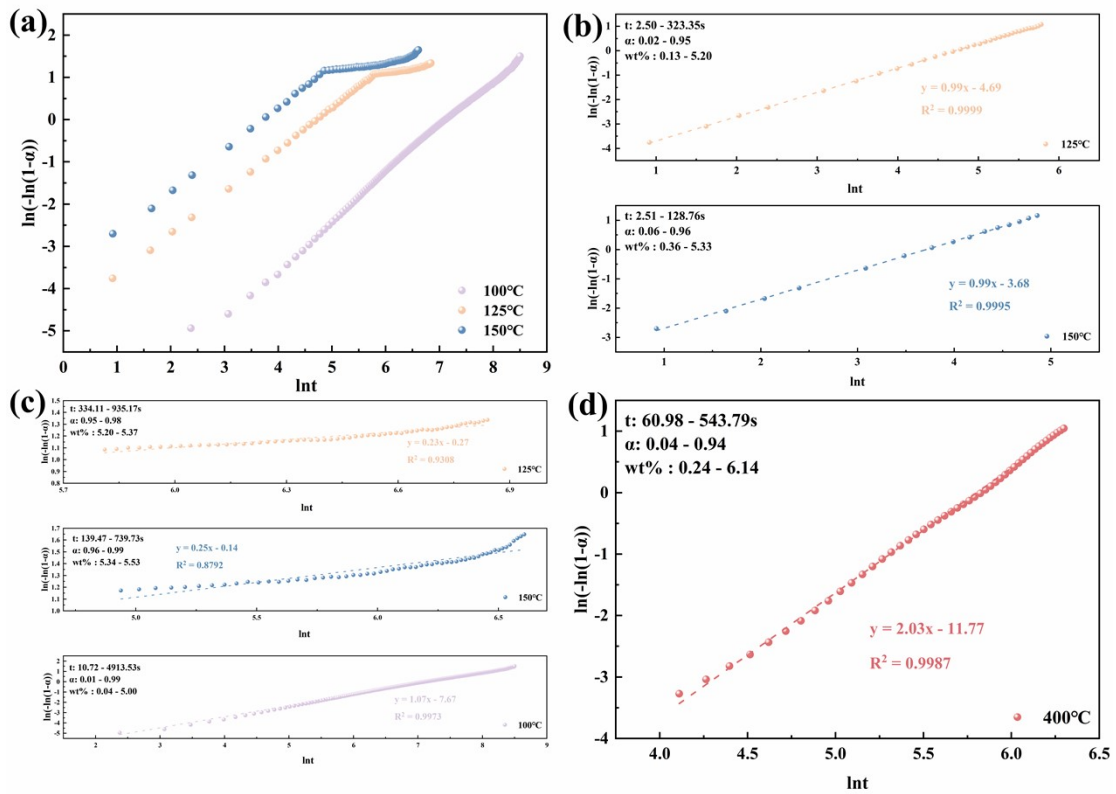

18

19 Fig. S4. JMAK fitting plots of MgH<sub>2</sub>-CTi<sub>4</sub>Ni@CNT<sub>1</sub> at 100, 125 and 150°C: (a) overall  
 20 hydrogenation, (b) early hydrogenation, (c) late hydrogenation; (d) JMAK fitting plots of BM-

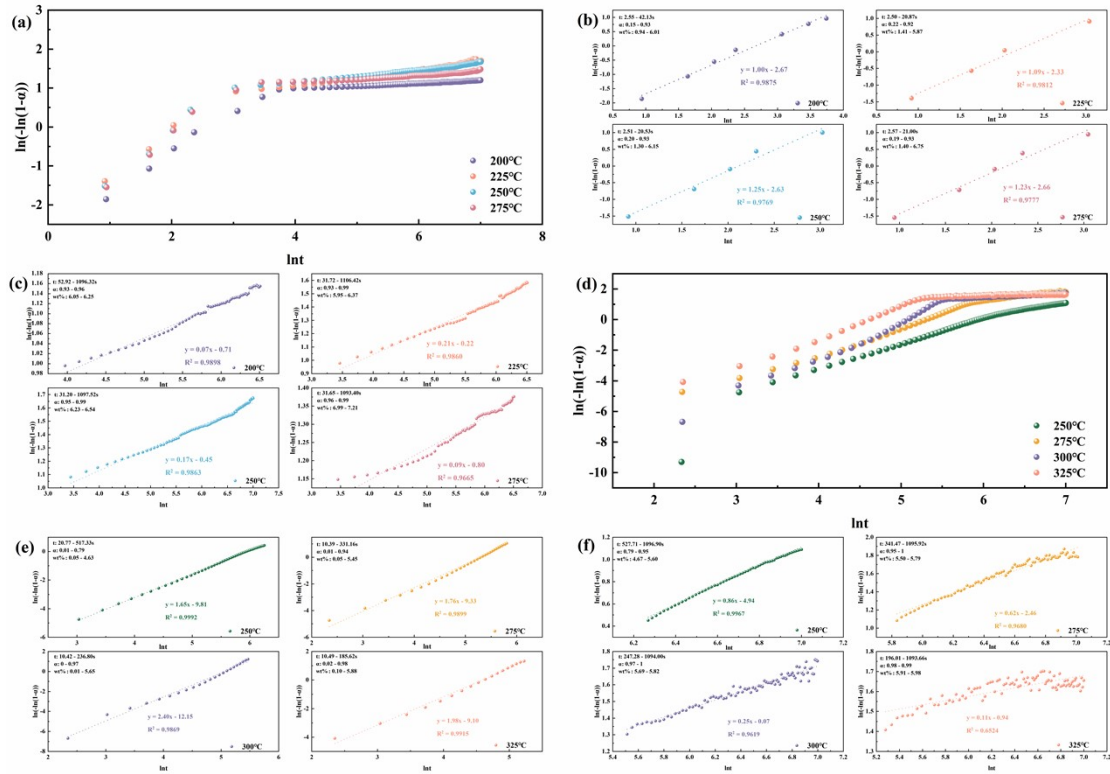

22

23

24

25

26

27

28

29

30

31

32

33

34

35

36

37

38

39

40

41

42

Fig. S5. JMAK fitting plots of MgH<sub>2</sub>-CTi<sub>4</sub>Ni@CNT<sub>1</sub>: (a) overall hydrogenation, (b) early hydrogenation, (c) late hydrogenation, (d) overall dehydrogenation, (e) early dehydrogenation, (f) late dehydrogenation.

The fitting results shown in Figs. S3, S4, and S5 reveal a common trend for both MgH<sub>2</sub>-CTi<sub>4</sub>Ni@CNT<sub>1</sub> and BM-MgH<sub>2</sub>: the segmented characteristics of the JMAK curves become increasingly pronounced with increasing temperature. This indicates that the hydrogen absorption and desorption processes of both samples are not governed by a single kinetic step, but rather consist of multiple reaction processes.

Based on this feature, a segmented fitting method was adopted in this work to extract the  $\ln k$  values for activation-energy calculation, instead of treating the data uniformly on the basis of the overall reaction fraction  $\alpha$ . The purpose of this treatment is to ensure, as far as possible, that the selected fitting interval at a given temperature corresponds to a relatively consistent overall rate-controlling regime, thereby making the activation-energy analysis more physically meaningful.

However, the increase in temperature only enhances the separation of different rate-controlling steps to a certain extent, and does not imply that the kinetic parameters extracted at different temperatures correspond to exactly the same single reaction process. In other words, the relative contributions of the individual subprocesses to the overall macroscopic reaction vary with temperature, and therefore

43 the  $\ln k$  values obtained at different temperatures do not strictly correspond to the same  
 44 kinetic “object”. This is also the main reason why the  $R^2$  values of the activation-  
 45 energy fitting could not be guaranteed to exceed 0.99.

46 Therefore, the activation energies obtained in this work are more appropriately  
 47 interpreted as apparent activation energies, rather than the intrinsic activation energy  
 48 of a single elementary reaction step. This treatment provides a more reasonable  
 49 description of the overall kinetic characteristics of hydrogen absorption and  
 50 desorption in complex systems such as  $\text{MgH}_2\text{-CTi}_4\text{Ni@CNT}_1$  and  $\text{BM-MgH}_2$ .

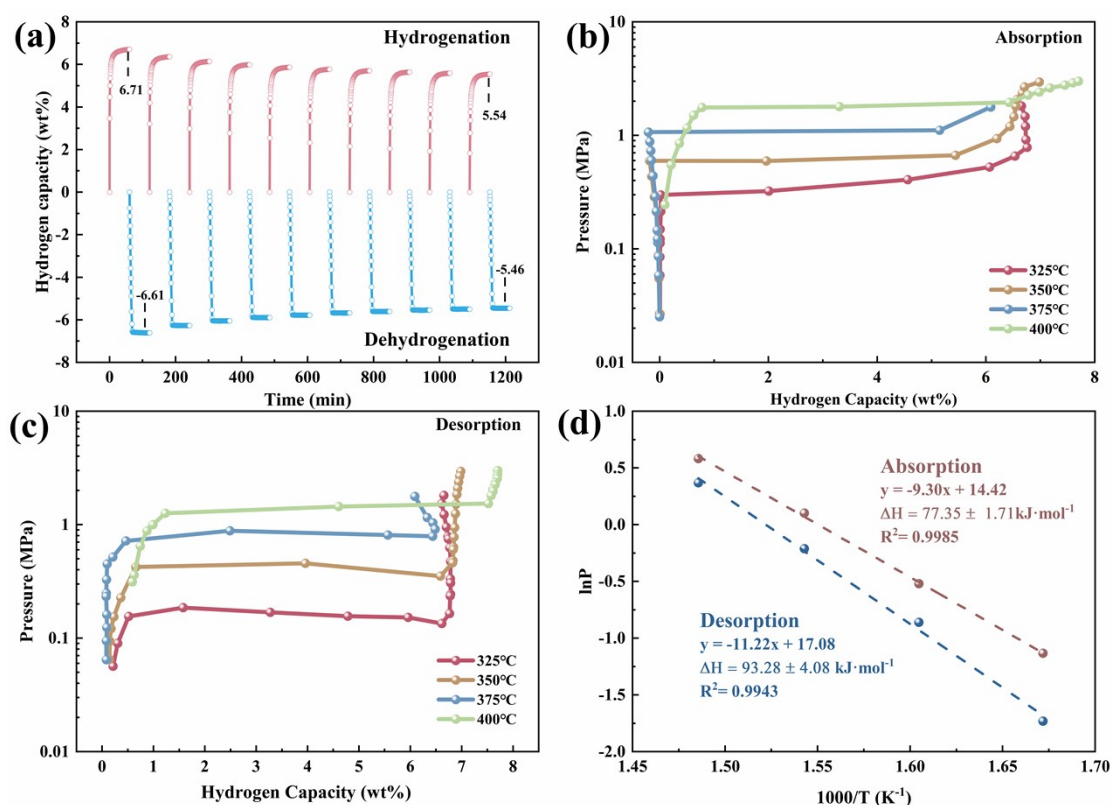

51  
 52  
 53  
 54

Fig. S6. (a) Cycle test curve of Ball milled MgH<sub>2</sub>; PCT test curve of BM-MgH<sub>2</sub> by (b) hydrogenation and (c) dehydrogenation; (d) Fit results of BM-MgH<sub>2</sub> by van't Hoff equation.

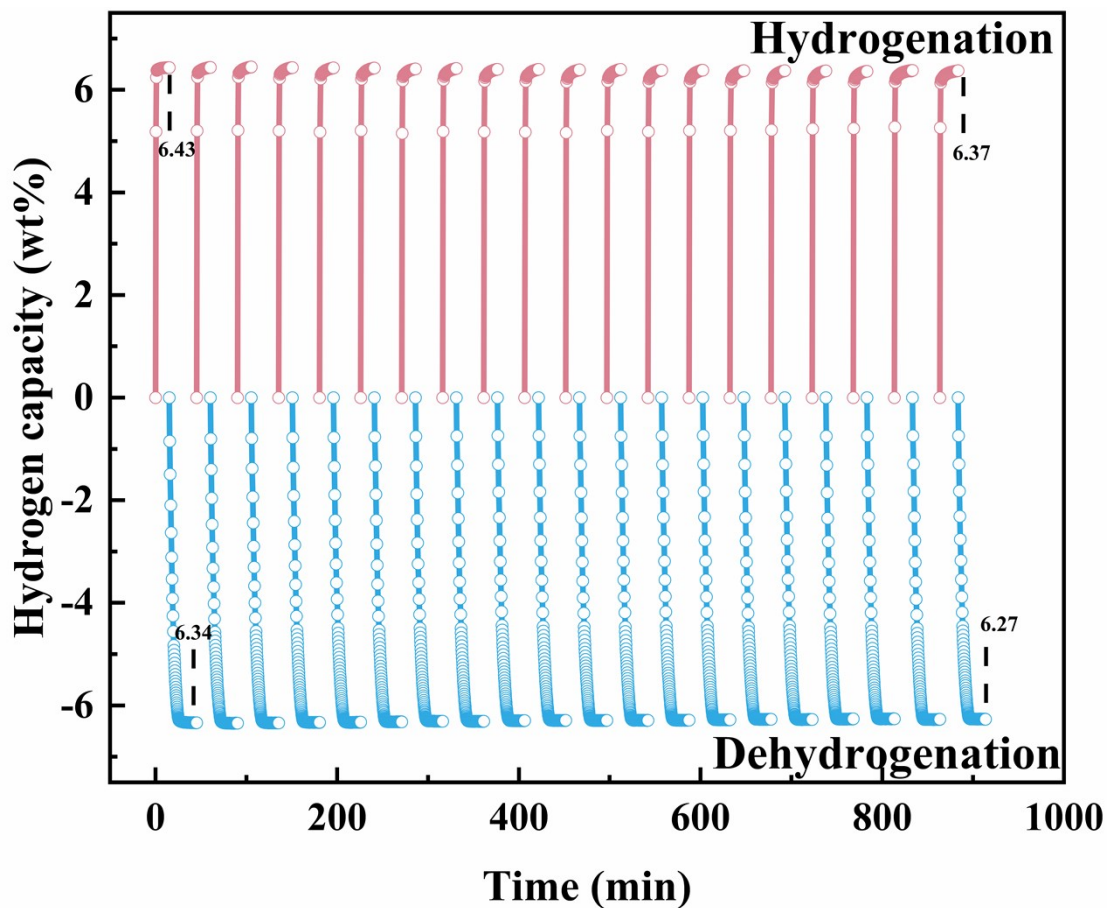

55  
56

Fig. S7. Cyclic results of  $\text{MgH}_2\text{-CTi}_4\text{Ni@CNT}_1$  after compaction.

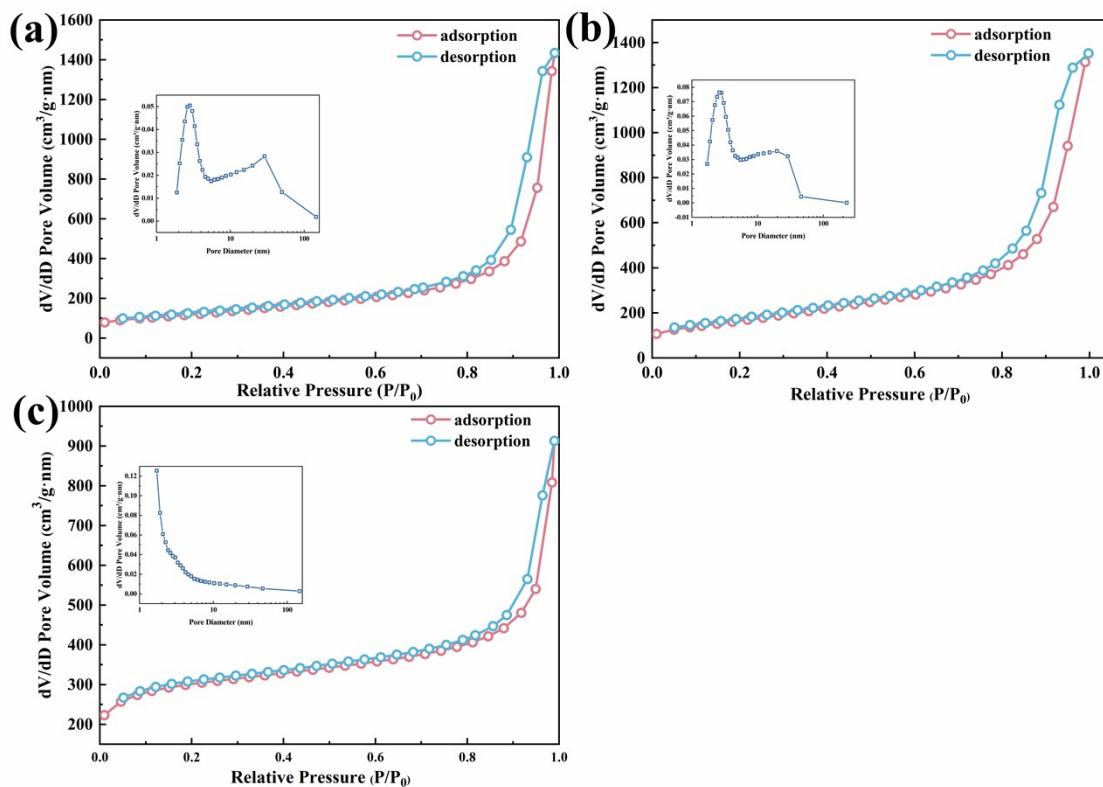

57

58 Fig. S8. BET specific surface area and pore size test results of (a)  $\text{CNT}_1$ , (b)  $\text{CNT}_2$  and (c)  $\text{CNT}_3$ .

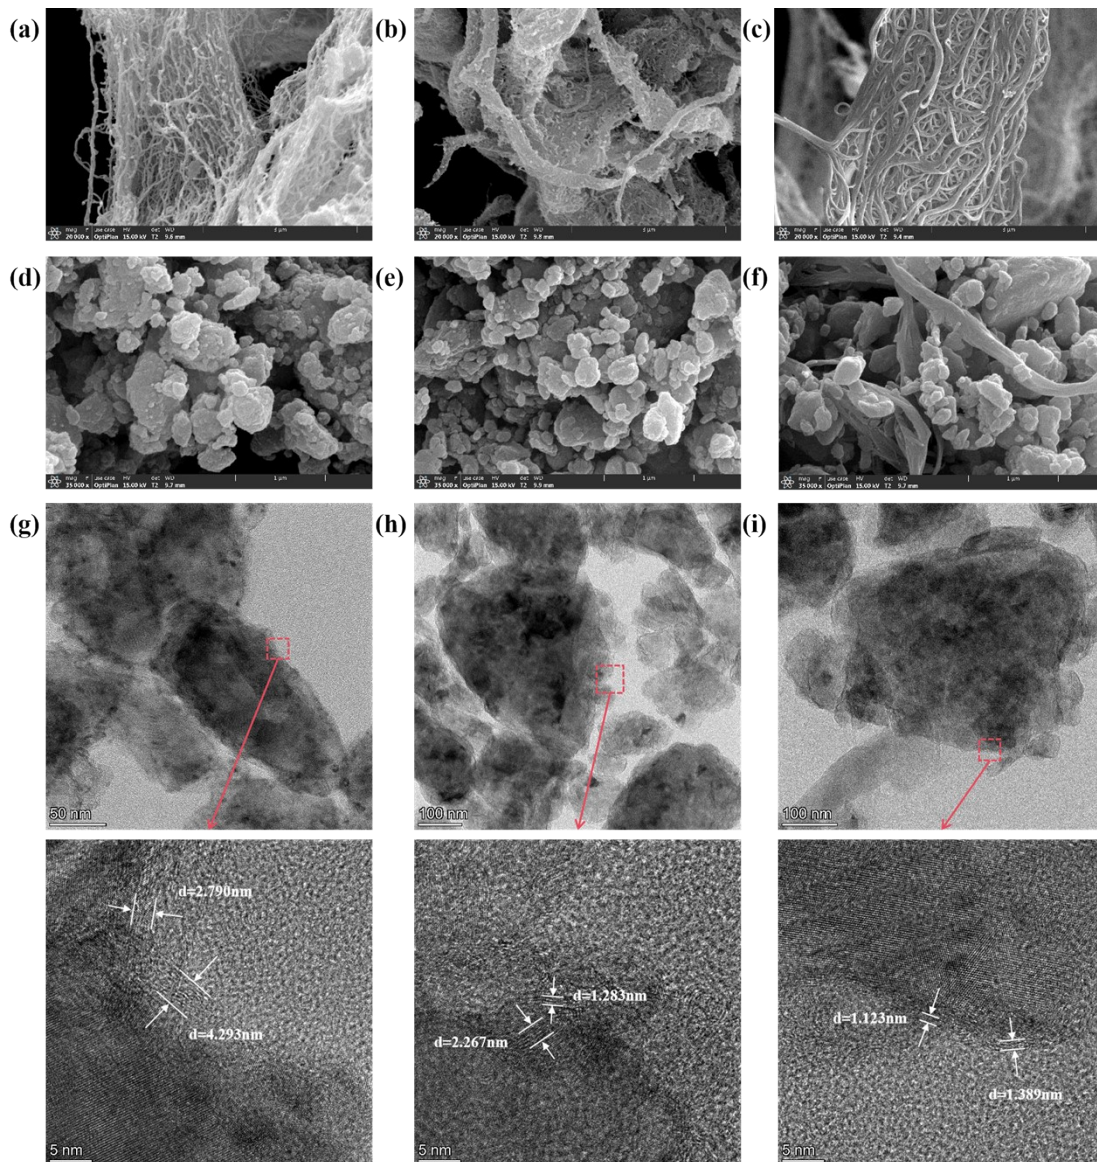

60

61 Fig. S9. SEM images of (a) CNT<sub>1</sub>, (b) CNT<sub>2</sub>, (c) CNT<sub>3</sub>, (d) MgH<sub>2</sub>-5wt% CNT<sub>1</sub>, (e) MgH<sub>2</sub>-5wt%  
 62 CNT<sub>2</sub> and (f) MgH<sub>2</sub>-5wt% CNT<sub>3</sub>; TEM and HRTEM images of (g) MgH<sub>2</sub>-5wt% CNT<sub>1</sub>, (h) MgH<sub>2</sub>-  
 63 5wt% CNT<sub>2</sub> and (i) MgH<sub>2</sub>-5wt% CNT<sub>3</sub>.

64

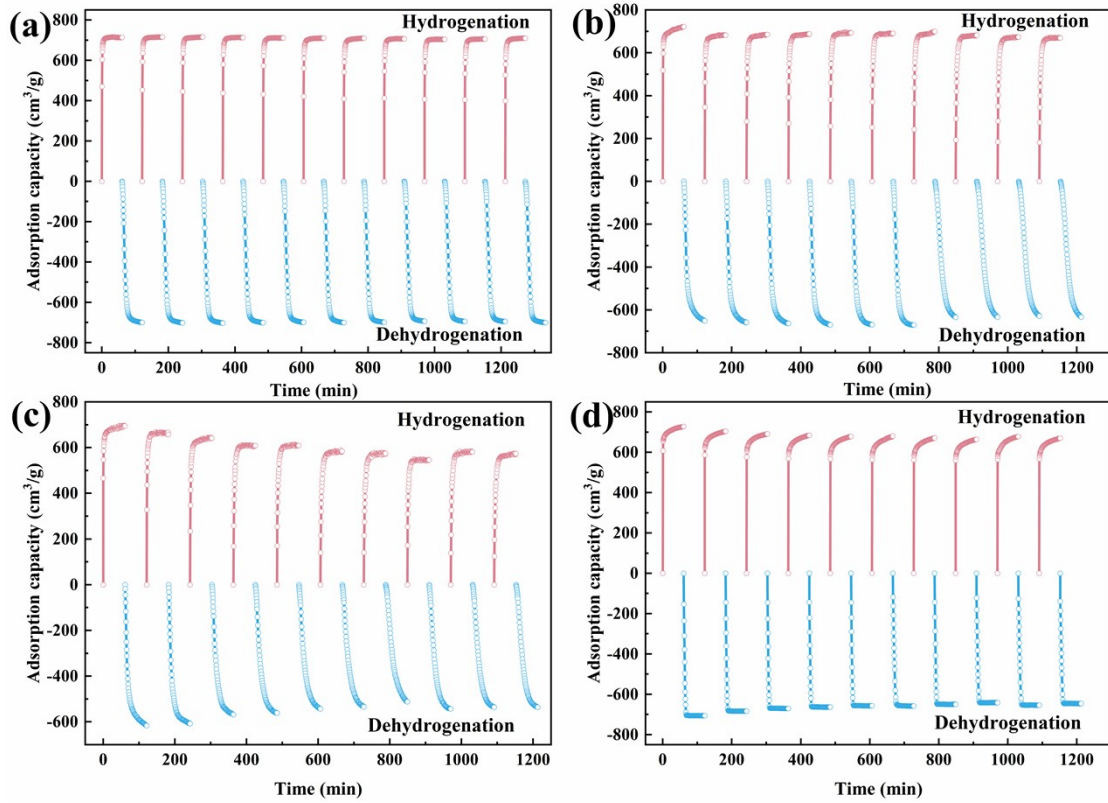

65

66 Fig. S10. Cycle test data of (a)  $\text{MgH}_2\text{-5wt}\%\text{CNT}_1$ , (b)  $\text{MgH}_2\text{-5wt}\%\text{CNT}_2$ , (c)  $\text{MgH}_2\text{-5wt}\%\text{CNT}_3$   
 67 and (d)  $\text{MgH}_2\text{-7.5wt}\%\text{Ti}_4\text{Ni}$ .

68

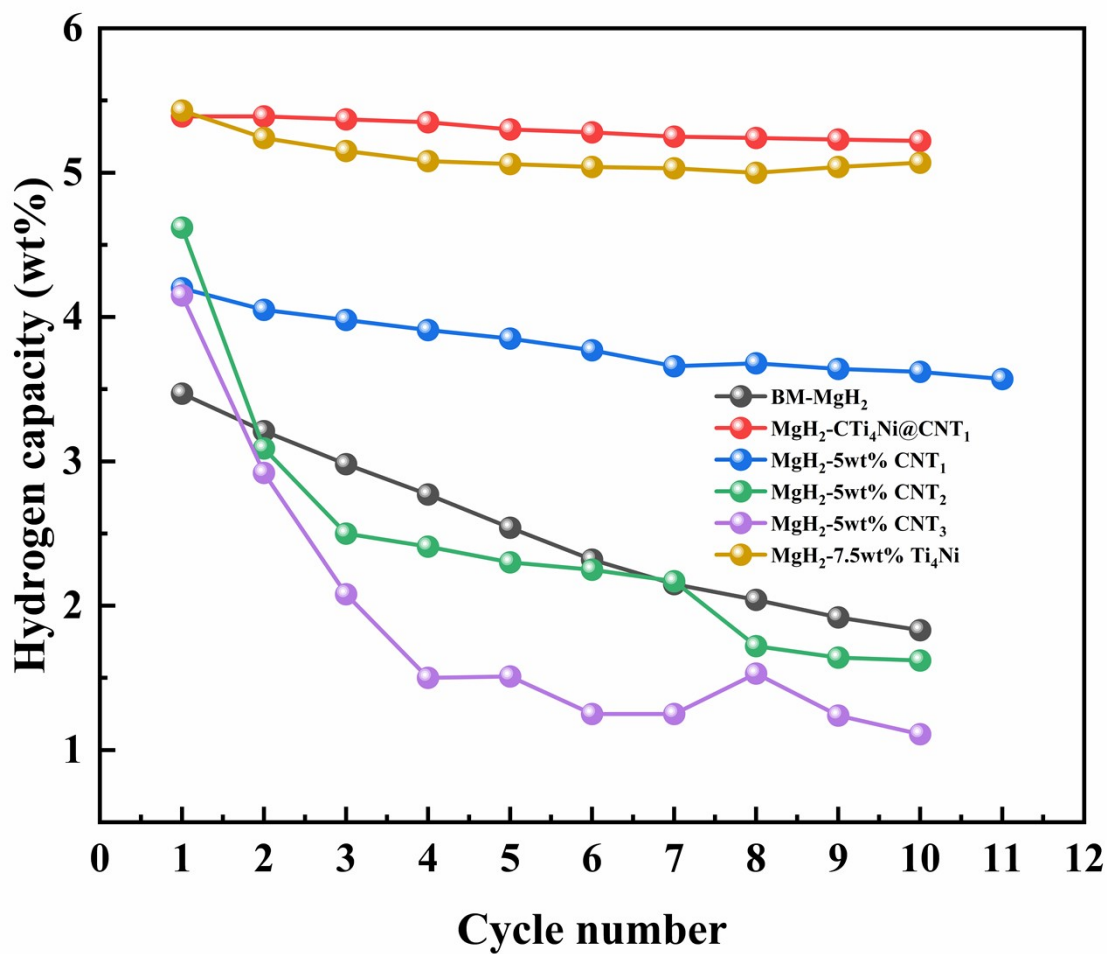

69

70 Fig. S11. Comparison of hydrogen absorption changes in the first 30 seconds of cyclic testing.

71

72

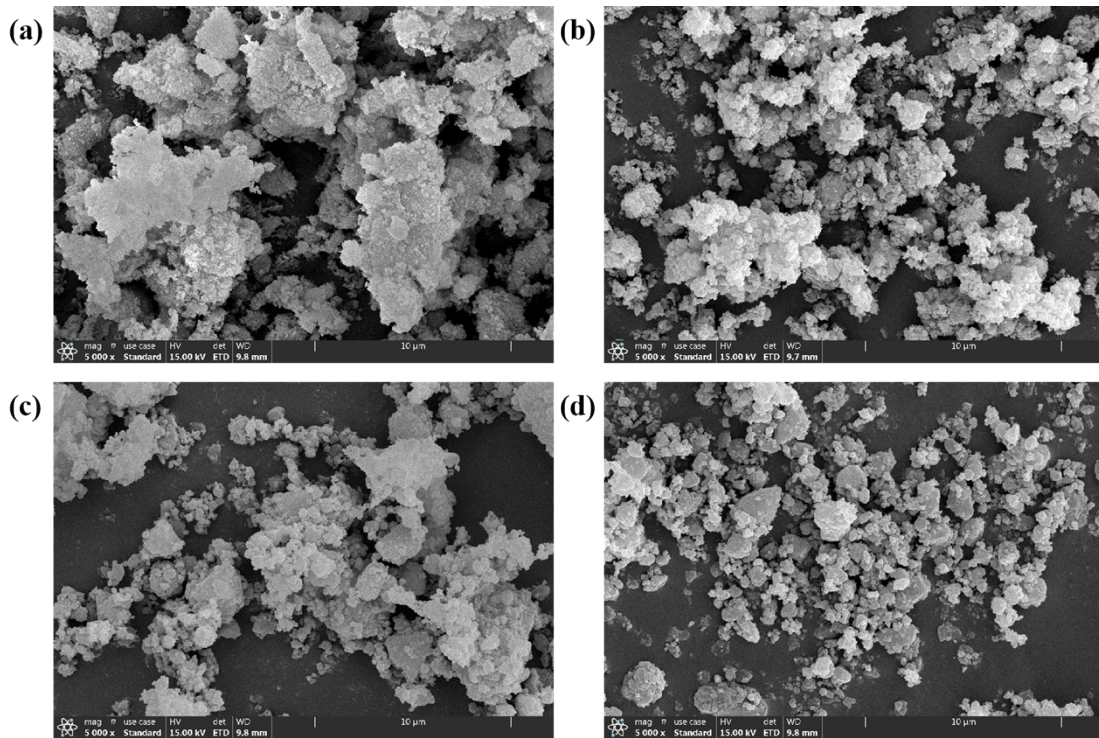

73  
74  
75  
76

Fig. S12. SEM images of (a) BM-MgH<sub>2</sub> after cycling, (b) MgH<sub>2</sub>-CTi<sub>4</sub>Ni@CNT<sub>1</sub> after cycling, (c) BM-MgH<sub>2</sub> before cycling, and (d) MgH<sub>2</sub>-CTi<sub>4</sub>Ni@CNT<sub>1</sub> before cycling.

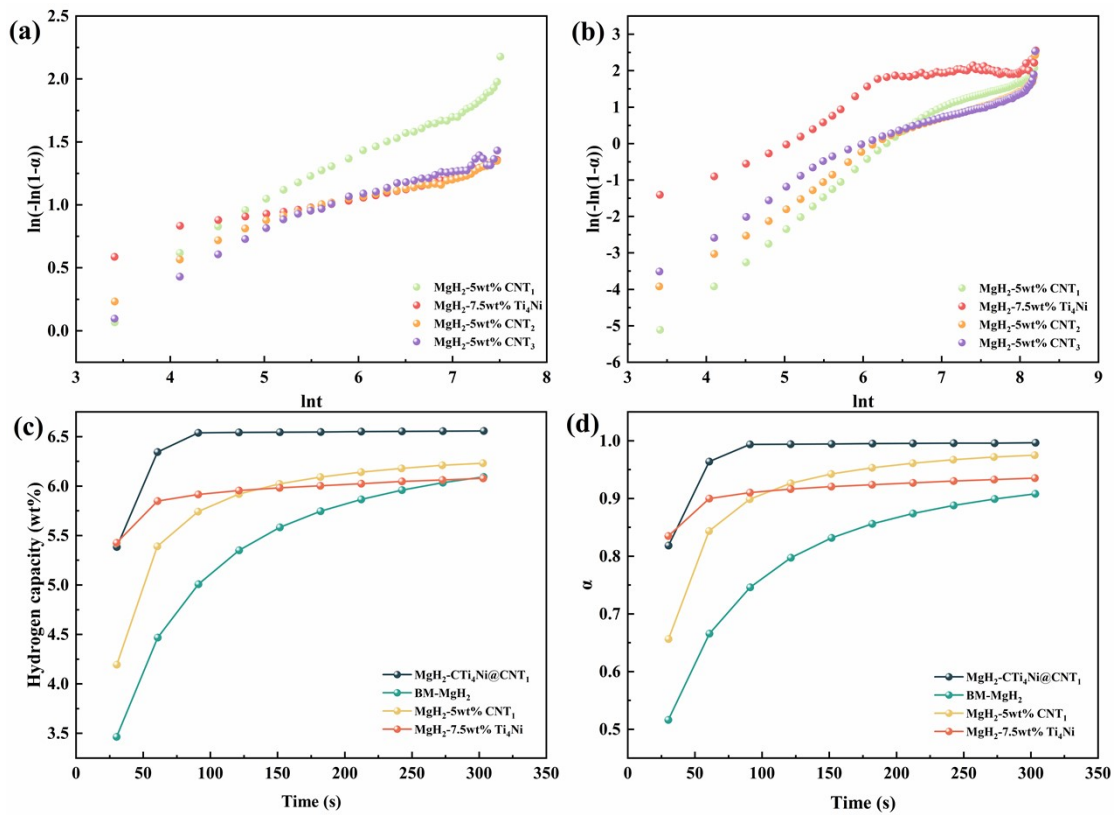

77  
78  
79  
80

Fig S13. JMAK of MgH<sub>2</sub>-5wt%CNT<sub>1</sub>, MgH<sub>2</sub>-5wt%CNT<sub>2</sub>, MgH<sub>2</sub>-5wt%CNT<sub>3</sub> and MgH<sub>2</sub>-7.5wt%Ti<sub>4</sub>Ni: (a) hydrogen absorption, (b) hydrogen desorption; (c) hydrogen absorption capacity and (d) reaction progress of BM-MgH<sub>2</sub>, MgH<sub>2</sub>-CTi<sub>4</sub>Ni@CNT<sub>1</sub>, MgH<sub>2</sub>-5wt%CNT<sub>1</sub> and MgH<sub>2</sub>-

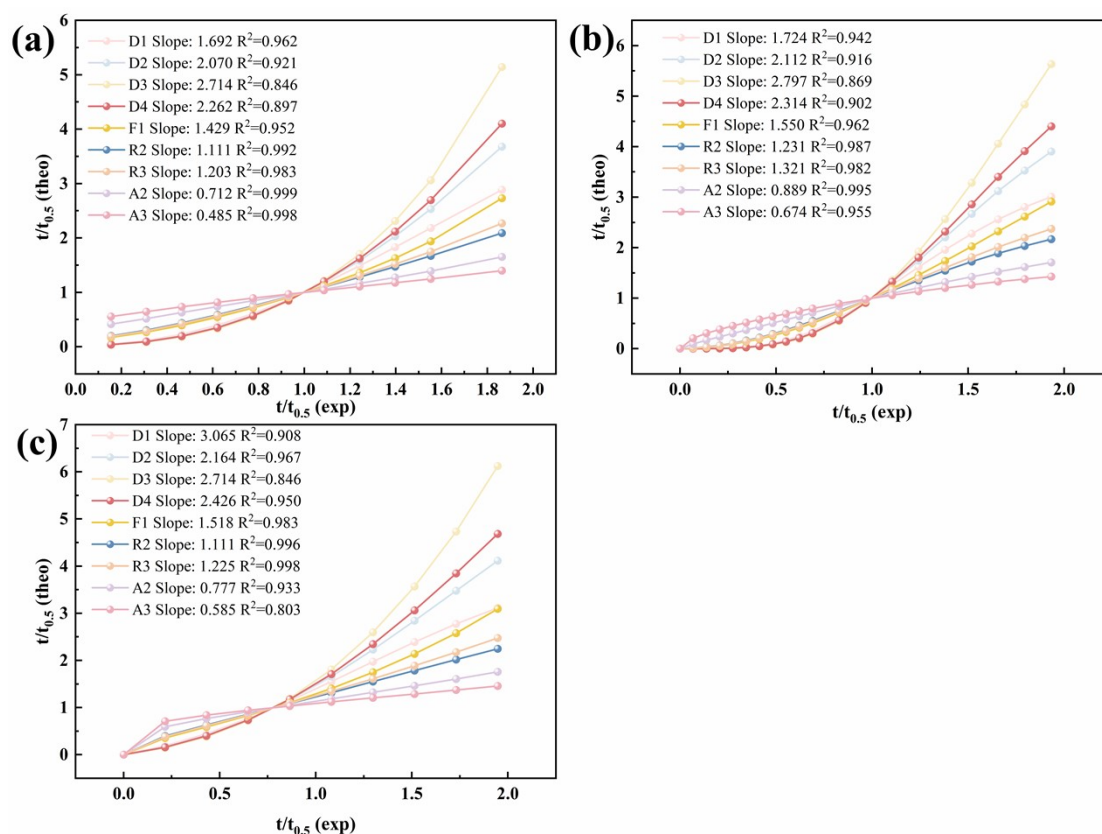

82

83 Fig. S14. Comparison of  $t/t_{0.5}$  (theo) and  $t/t_{0.5}$  (exp) for isothermal dehydrogenation of (a) BM-  
 84 MgH<sub>2</sub>, (b) MgH<sub>2</sub>-5wt%CNT<sub>1</sub> and (c) MgH<sub>2</sub>-7.5wt%Ti<sub>4</sub>Ni.

85

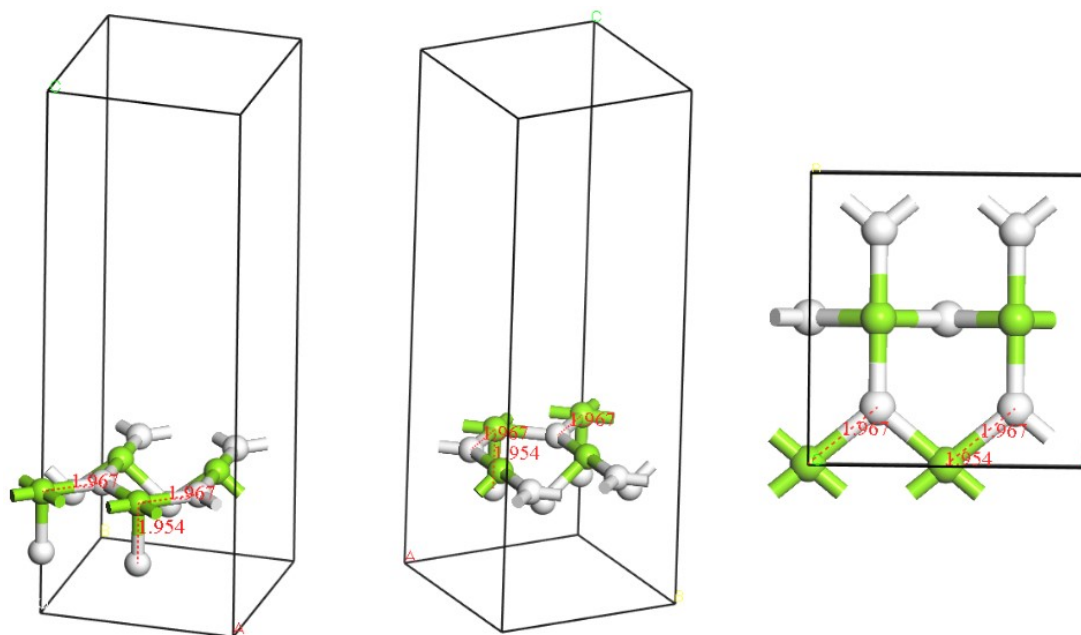

86

87 Fig. S15. Sectional model of pure MgH<sub>2</sub> on the (1 1 0) plane. (green: Mg, white: H)

88

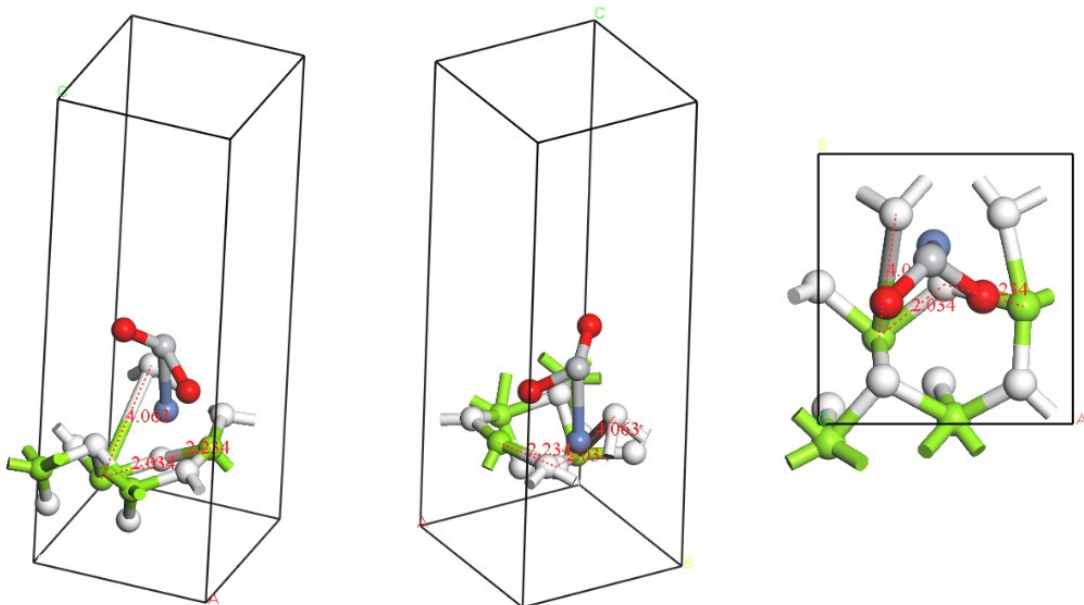

89  
90  
91  
92

Fig. S16. Sectional model of  $\text{MgH}_2$  doped with  $\text{Ti}_4\text{Ni}$  on the (1 1 0) plane. (green: Mg, white: H, blue: Ni, gray: Ti, red: O)

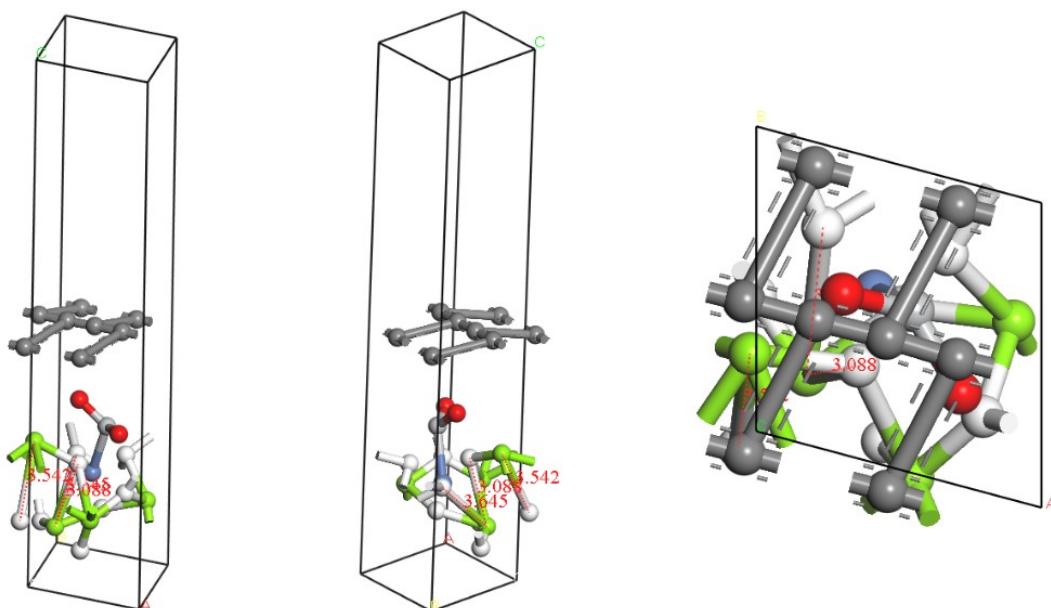

93  
94  
95  
96

Fig. S17. Sectional model of  $\text{MgH}_2$  doped with  $\text{Ti}_4\text{Ni}$  and  $\text{CNT}_1$  on the (1 1 0) plane. (green: Mg, white: H, blue: Ni, gray: Ti, red: O, black: C)

97 The introduction of a vacuum layer is to avoid the influence of periodic  
98 repetitive structures. Due to the sufficient thickness of the vacuum layer, the impact  
99 on the calculation of electronic properties can be ignored.

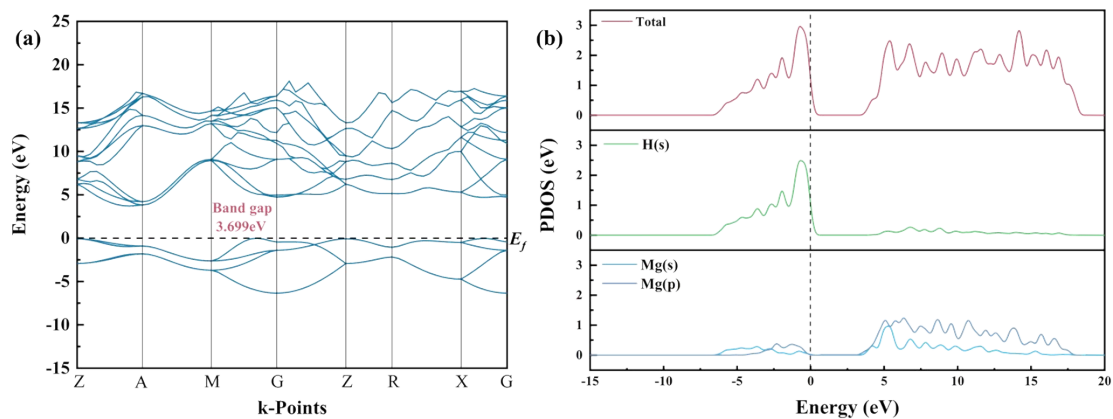

100  
101  
102

Fig. S18. (a) Band structure and (b) density of states of MgH<sub>2</sub> (1 1 0) section.

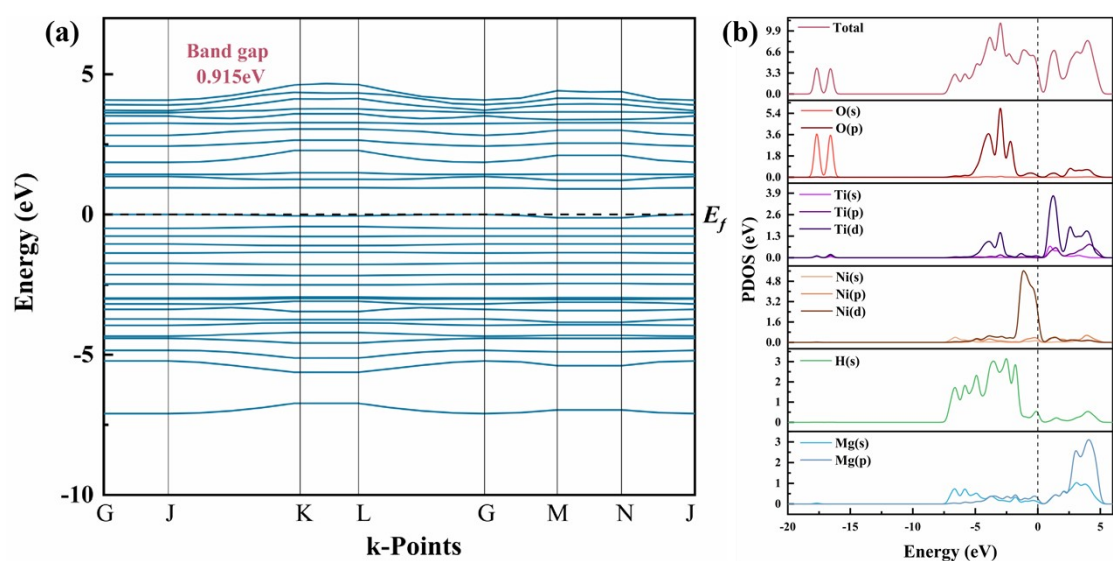

103  
104  
105  
106  
107

Fig. S19. (a) Band structure and (b) density of states of MgH<sub>2</sub> (1 1 0) section doped with Ti<sub>4</sub>Ni.

Table S1  $\ln k$  value in activation energy calculation

|                                                        | Temperature<br>(°C) | 1000/T<br>(K <sup>-1</sup> ) | $\ln k$ |       |
|--------------------------------------------------------|---------------------|------------------------------|---------|-------|
| MgH <sub>2</sub> -CTi <sub>4</sub> Ni@CNT <sub>1</sub> | 100                 | 2.68                         | -7.17   |       |
|                                                        | 125                 | 2.51                         | -4.74   |       |
|                                                        | 150                 | 2.36                         | -3.72   |       |
|                                                        | Hydrogenation       | 200                          | 2.11    | -2.67 |
|                                                        | 225                 | 2.01                         | -2.13   |       |
|                                                        | 250                 | 1.91                         | -2.11   |       |
|                                                        | 275                 | 1.82                         | -2.16   |       |
|                                                        | Dehydrogenation     | 250                          | 1.91    | -5.95 |
|                                                        | 275                 | 1.82                         | -5.29   |       |
|                                                        | 300                 | 1.74                         | -5.06   |       |
|                                                        | 325                 | 1.67                         | -4.59   |       |

|                     |                 |     |      |       |
|---------------------|-----------------|-----|------|-------|
|                     |                 | 200 | 2.11 | -6.83 |
|                     | Hydrogenation   | 225 | 2.01 | -6.47 |
|                     |                 | 250 | 1.91 | -5.49 |
|                     |                 | 325 | 1.67 | -3.61 |
|                     |                 | 250 | 1.91 | -8.20 |
| BM-MgH <sub>2</sub> |                 | 275 | 1.82 | -7.91 |
|                     |                 | 300 | 1.74 | -8.38 |
|                     | Dehydrogenation | 325 | 1.67 | -8.29 |
|                     |                 | 350 | 1.60 | -7.19 |
|                     |                 | 375 | 1.54 | -6.21 |
|                     |                 | 400 | 1.49 | -5.80 |

108

109

110

111

Table S2 Plateau pressures

| Reaction process    | Materials                                              | Temperature (°C) | Plateau pressures (MPa) |
|---------------------|--------------------------------------------------------|------------------|-------------------------|
| Hydrogen absorption | BM-MgH <sub>2</sub>                                    | 325              | 0.322                   |
|                     |                                                        | 350              | 0.595                   |
|                     |                                                        | 375              | 1.108                   |
|                     |                                                        | 400              | 1.792                   |
|                     | MgH <sub>2</sub> -CTi <sub>4</sub> Ni@CNT <sub>1</sub> | 325              | 0.632                   |
|                     |                                                        | 350              | 0.843                   |
|                     |                                                        | 375              | 1.106                   |
|                     |                                                        | 400              | 1.400                   |
| Hydrogen desorption | BM-MgH <sub>2</sub>                                    | 325              | 0.177                   |
|                     |                                                        | 350              | 0.423                   |
|                     |                                                        | 375              | 0.809                   |
|                     |                                                        | 400              | 1.446                   |
|                     | MgH <sub>2</sub> -CTi <sub>4</sub> Ni@CNT <sub>1</sub> | 325              | 0.491                   |
|                     |                                                        | 350              | 0.663                   |
|                     |                                                        | 375              | 0.935                   |
|                     |                                                        | 400              | 1.257                   |

112

113 During the PCT testing process, pressure can vary. Therefore, when selecting the  
 114 platform pressure for fitting, it is usually necessary to take the average of at least two  
 115 consecutive data points, and the pressure difference between these two data points  
 116 should not exceed 0.05 MPa. If multiple consecutive data points meet this  
 117 requirement, then the average of these data points should be taken.

118 Table S3 Detailed data of three types of carbon nanotubes

| Materials | Specific surface areas (m <sup>2</sup> ·g <sup>-1</sup> ) | Pore size (nm) | Type of pore | Thickness (nm) |
|-----------|-----------------------------------------------------------|----------------|--------------|----------------|
|-----------|-----------------------------------------------------------|----------------|--------------|----------------|

|                  |      |        |             |           |
|------------------|------|--------|-------------|-----------|
| CNT <sub>1</sub> | 400  | 2 - 20 | mesoporous  | 2.7 - 4.3 |
| CNT <sub>2</sub> | 600  | 2 - 10 | mesoporous  | 1.2 - 2.3 |
| CNT <sub>3</sub> | 1100 | < 5    | microporous | 1.1 - 1.4 |

119

120

Table S4 Detailed comparison of cyclic performance data

| Materials                                                               | Adsorption capacity (wt%) |      | Desorption capacity (wt%) |      | Adsorption capacity (cm <sup>3</sup> /g) |      | Desorption capacity (cm <sup>3</sup> /g) |      | Cycle capacity retention rate (%) |            | Adsorption capacity within the first 30s (wt%) |
|-------------------------------------------------------------------------|---------------------------|------|---------------------------|------|------------------------------------------|------|------------------------------------------|------|-----------------------------------|------------|------------------------------------------------|
|                                                                         | 1st                       | 10th | 1st                       | 10th | 1st                                      | 10th | 1st                                      | 10th | Adsorption                        | Desorption |                                                |
| MgH <sub>2</sub> -CTi <sub>4</sub> Ni@CNT <sub>1</sub>                  | 6.5                       | 6.4  | 6.4                       | 6.3  | 736.                                     | 727. | 719.                                     | 712. | 98.6                              | 99.1       | 5.39                                           |
| BM-MgH <sub>2</sub>                                                     | 6.7                       | 5.5  | 6.6                       | 5.4  | 751.                                     | 620. | 740.                                     | 611. | 82.6                              | 82.6       | 3.47                                           |
| MgH <sub>2</sub> -5wt%CNT <sub>1</sub>                                  | 6.3                       | 6.3  | 6.2                       | 6.2  | 713.                                     | 700. | 709.                                     | 699. | 98.1                              | 98.6       | 4.20                                           |
| MgH <sub>2</sub> -5wt%CNT <sub>2</sub>                                  | 6.4                       | 5.9  | 5.8                       | 5.6  | 721.                                     | 669. | 651.                                     | 633. | 92.7                              | 97.3       | 4.62                                           |
| MgH <sub>2</sub> -5wt%CNT <sub>3</sub>                                  | 6.2                       | 5.1  | 5.5                       | 4.7  | 694.                                     | 573. | 616.                                     | 536. | 82.5                              | 87.0       | 4.15                                           |
| MgH <sub>2</sub> -7.5wt%Ti <sub>4</sub> Ni                              | 6.5                       | 5.9  | 6.3                       | 5.7  | 728.                                     | 670. | 706.                                     | 646. | 92.0                              | 91.5       | 5.43                                           |
| MgH <sub>2</sub> -CTi <sub>4</sub> Ni@CNT <sub>1</sub> after compaction | 1st                       | 20th | 1st                       | 20th | 1st                                      | 20th | 1st                                      | 20th | 99.1                              | 98.9       | 5.19                                           |
|                                                                         | 6.4                       | 6.3  | 6.3                       | 6.2  | 720.                                     | 713. | 709.                                     | 702. |                                   |            |                                                |
|                                                                         | 3                         | 7    | 4                         | 7    | 7                                        | 8    | 6                                        | 1    |                                   |            |                                                |

121

122

Table S5 Grain size calculated based on the (101) crystal plane

| Materials                    | Grain size (nm) |
|------------------------------|-----------------|
| Dehydrogenation              | 79.23           |
| Dehydrogenation (10th cycle) | 83.64           |

123

124

XRD results was used to calculated grain size, combined with Scherrer formula:

125

$$D = K\lambda / \beta \cos\theta \quad (1)$$

126

127

128

$D$  is the grain size (nm),  $K$  is the Scherrer constant 0.89,  $\lambda$  is the X-ray incident wavelength (nm),  $B$  is the diffraction peak broadening amount (rad), and  $\theta$  is the Bragg angle (rad).

129
